# Supplementary material for: Implementation and Evaluation of a Mobile-Based Exercise Intervention for Knee Osteoarthritis in Rural Communities: A Mixed-Methods Study
Source: Research Square preprint supplement (doi:10.21203/rs.3.rs-8299400/v1), 2025-12-23
Supplement: Supplementary file 1 [file b703e1261455b0f5e76dd663.docx]

**SEMI-STRUCTURED INTERVIEW GUIDE**

**Sample of guiding questions**

**1.** Can you tell me about your general thoughts on using digital tools or mobile apps for health?
**2.** What were your first reactions when you were introduced to this mobile-based osteoarthritis exercise app?
**3.** In what ways do you think this tool might help in managing your pain or mobility?
**4.** What parts of using this tool felt easy or comfortable for you?
**5.** What parts felt difficult or challenging?
**6.** Can you describe any barriers you experienced—such as language, network, or technological issues?
**7.** How did you usually manage your osteoarthritis symptoms before using the app, and did the app change this in any way?
**8.** What features or information do you think would make this tool more useful for people in your community?
**9.** What kind of support would help you use the app better (in-person training, video demonstrations, reminders, local language instructions)?
**10.** Is there anything else you would like to share about your experience using this digital tool?
